# Supplementary material for: The Hypothalamic–Pituitary–Thyroid Axis Equivalent in Normal and Cancerous Oral Tissues: A Scoping Review
Source: MDPI journal article supplement (doi:10.3390/ijms232214096), 2022-11-15
Supplement: s1 [file s1]

**Supplementary Table S1.** Cohen Kappa analysis

|             | <b>B.Y Include</b> | <b>B.Y Exclude</b> | <b>S.X Include</b> | <b>S.X Exclude</b> | <b>J.Y Include</b> | <b>J.Y Exclude</b> |
|-------------|--------------------|--------------------|--------------------|--------------------|--------------------|--------------------|
| L.W include | 38                 | 8                  | 28                 | 1                  | 33                 | 2                  |
| L.W exclude | 0                  | 15                 | 1                  | 30                 | 2                  | 10                 |
| Cohen's k   | 0.7002             |                    | 0.933              |                    | 0.776              |                    |

**Supplementary Table S2.** Difference in average TRH methylation levels between different groups in the THR gene sequence

| <b>Author (Year)</b>          | <b>Cohort</b>                    | <b>Group (Sample): %TRH Methylation Average <math>\pm</math> SD</b>                      | <b><i>p</i>-Value</b> |
|-------------------------------|----------------------------------|------------------------------------------------------------------------------------------|-----------------------|
| Puttipanyalears et al. (2018) | Not applicable: validation study | OSCC: 52.96 $\pm$ 5.36<br>Control: 5.7 $\pm$ 0.85                                        | <0.001*               |
|                               | Cohort 1                         | OSCC (oral rinse): 3.77 $\pm$ 0.60<br>Control (oral rinse): 2.66 $\pm$ 0.76              | <0.001*               |
|                               |                                  | OSCC (oral swab): 4.17 $\pm$ 0.58<br>OSCC (oral rinse): 3.77 $\pm$ 0.60                  | 0.0012*               |
|                               | Cohort 2                         | OSCC (oral rinse): 3.78 $\pm$ 0.48<br>Control (oral rinse): 2.86 $\pm$ 0.64              | <0.001*               |
|                               |                                  | Oropharyngeal SCC (oral rinse): 3.54 $\pm$ 0.37<br>Control (oral rinse): 2.86 $\pm$ 0.64 | <0.001*               |
|                               |                                  | OSCC (oral rinse): 3.78 $\pm$ 0.48<br>Oropharyngeal SCC (oral rinse): 3.54 $\pm$ 0.37    | NS                    |

\* indicates statistically significant; NS indicates not statistically significant
